# Supplementary material for: Fluorimetric Method for the Determination of Histidine in Random Human Urine Based on Zone Fluidics
Source: MDPI journal article supplement (doi:10.3390/molecules25071665), 2020-04-04
Supplement: s1 [file s1]

Supporting Information

# Fluorimetric Method for the Determination of Histidine in Random Human Urine Based on Zone Fluidics

Antonios Alevridis <sup>1</sup>, Apostolia Tsiasioti <sup>1</sup>, Constantinos K. Zacharis <sup>2</sup> and Paraskevas D. Tzanavaras <sup>1,\*</sup>

<sup>1</sup> Laboratory of Analytical Chemistry, School of Chemistry, Faculty of Sciences, Aristotle University of Thessaloniki, GR-54124 Thessaloniki, Greece; alevridi@chem.auth.gr (A.A.); atsiasioti@gmail.com (A.T.)

<sup>2</sup> Laboratory of Pharmaceutical Analysis, Department of Pharmaceutical Technology, School of Pharmacy, Aristotle University of Thessaloniki, GR-54124 Thessaloniki, Greece; czacharis@pharm.auth.gr

\* Correspondence: ptzanava@chem.auth.gr; Tel.: +30-2310997721, Fax: +30-2310997719

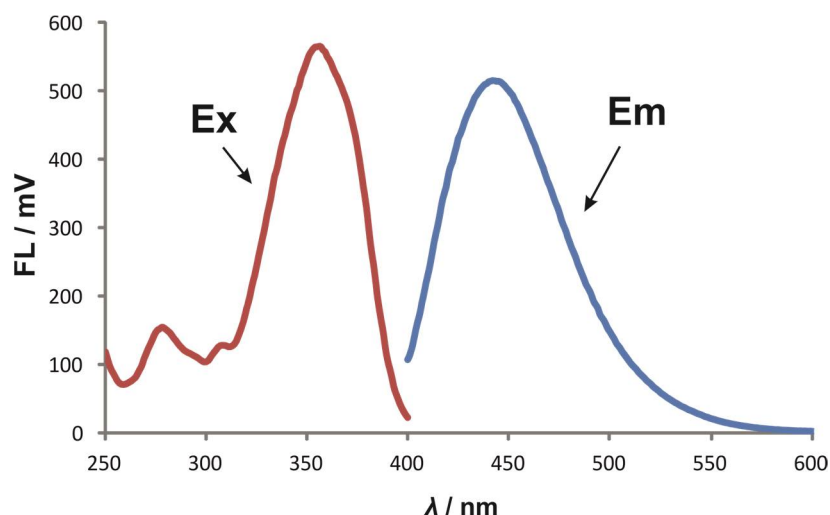

**Figure S1.** Representative FL off-line spectra of the HIS-OPA derivative.

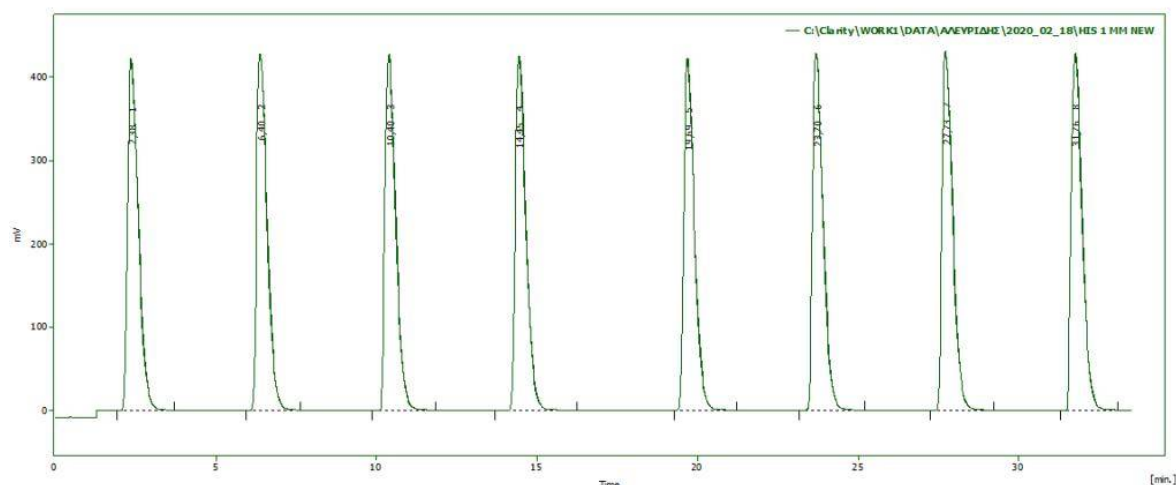

**Figure S2.** Within day precision at  $1.0 \mu\text{mol}\cdot\text{L}^{-1}$  HIS ( $n = 8$ ).

**Table S1.** Day-to-day precision of the developed method

| <b>Working Day</b>                  | <b>HIS Slope</b>    |
|-------------------------------------|---------------------|
| D1                                  | 444.6               |
| D2                                  | 426.6               |
| D3                                  | 423.0               |
| D4                                  | 423.5               |
| D5                                  | 423.1               |
| D6                                  | 423.3               |
| D7                                  | 425.3               |
| D8                                  | 382.6               |
| <b>Average (<math>\pm</math>SD)</b> | 421.4 ( $\pm$ 17.0) |
| <b>RSD (%)</b>                      | 4.2                 |
